# Supplementary material
Source: PubMed Central journal article supplement (PMC2780347)
Supplement: NIHMS144487-supplement-2.pdf [file NIHMS144487-supplement-2.pdf]

## Supplementary Information Titles

Please list each supplementary item and its title or caption, in the order shown below.

**Note that we do NOT copy edit or otherwise change supplementary information, and minor (nonfactual) errors in these documents cannot be corrected after publication.**

Please submit document(s) exactly as you want them to appear, with all text, images, legends and references in the desired order, and check carefully for errors.

**Journal:** Nature Medicine

|                       |                                                                                     |
|-----------------------|-------------------------------------------------------------------------------------|
| Article Title:        | Notch3 Signaling is Required for the Development of Pulmonary Arterial Hypertension |
| Corresponding Author: | Patricia A. Thistlethwaite M.D.-Ph.D.                                               |
|                       |                                                                                     |

| Supplementary Item & Number<br>(add rows as necessary) | Title or Caption                                                                                                                                                                                            |
|--------------------------------------------------------|-------------------------------------------------------------------------------------------------------------------------------------------------------------------------------------------------------------|
| Supplementary Figure 1                                 | Expression of <i>Notch3</i> target genes in pulmonary hypertensive and normotensive lung tissue from humans and rodents.                                                                                    |
| Supplementary Figure 2                                 | NOTCH3 and HES5 expression are predominantly localized to sPASCs in the media in vessels with neointimal thickening.                                                                                        |
| Supplementary Figure 3                                 | Agonist-mediated vasoconstriction in isolated small pulmonary arteries and pulmonary artery pressure as a function of flow in an isolated lung perfusion system are not affected by <i>Notch3</i> deletion. |
| Supplementary Figure 4                                 | Response to intravenous vasodilators in normoxic and chronically-hypoxic <i>Notch3</i> <sup>+/+</sup> and <i>Notch3</i> <sup>-/-</sup> mice.                                                                |
| Supplementary Figure 5                                 | Electron micrographs of 5 <sup>th</sup> -6 <sup>th</sup> order small intrapulmonary arteries 100µM in diameter from <i>Notch3</i> <sup>+/+</sup> and <i>Notch3</i> <sup>-/-</sup> mice.                     |
| Supplementary Table 1                                  | Pulmonary and systemic arterial pressures in mouse and rat PH                                                                                                                                               |
| Supplementary Table 2                                  | Semiquantitative morphometric analysis of pulmonary vascular lesions.                                                                                                                                       |
| Supplementary Methods and References                   | (Enclosed)                                                                                                                                                                                                  |
